# Supplementary material for: Noninvasive Stool RNA Test Approximates Disease Activity in Patients With Crohn’s Disease
Source: PubMed Central journal article supplement — Gastro Hep Adv. 2024 Jul 30;3(8):1079–86. doi: 10.1016/j.gastha.2024.07.012 (PMC11550734; doi:10.1016/j.gastha.2024.07.012), 2024-07-30

# Supplementary Tables and Figures

**Supplementary Figure 1. Overview of samples collected at various time points in the clinical trial.** Displayed are test results for on-therapy participants who had tests taken +/- 14 days from stool collection, and off-therapy participants' stool collection test. Tests taken include stool, colonoscopy, calprotectin, and C-reactive protein (CRP). The binary result of each test is displayed as positive (+) or negative (-). The color of each box represents the prediction made for each participant at each timepoint using the active/remission classifier presented in **Figure 2A**.

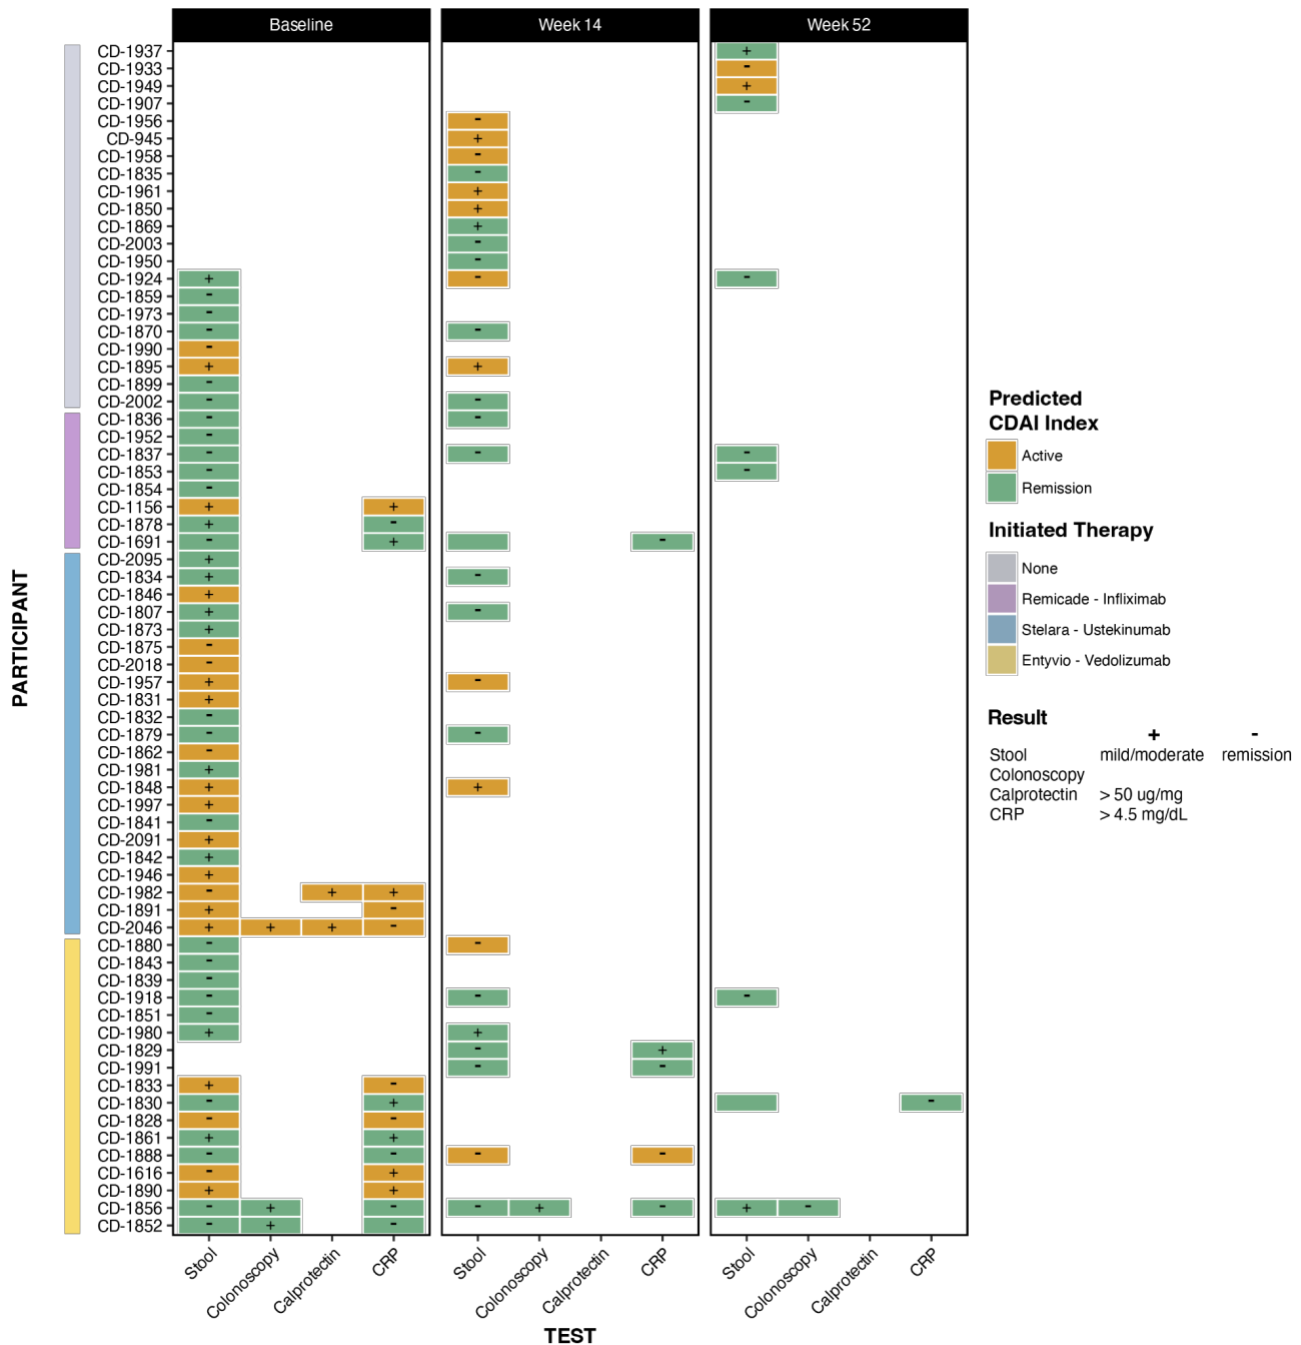

**Supplementary Figure 2. Quality and integrity of the seRNA for the 102 stool samples evaluated with the custom capture sequencing panel. A) Percent alignment of sequencing reads for all samples. B) Total sequencing reads for all samples.**

**A** Alignment (%) of all stool samples used in study (N=102)

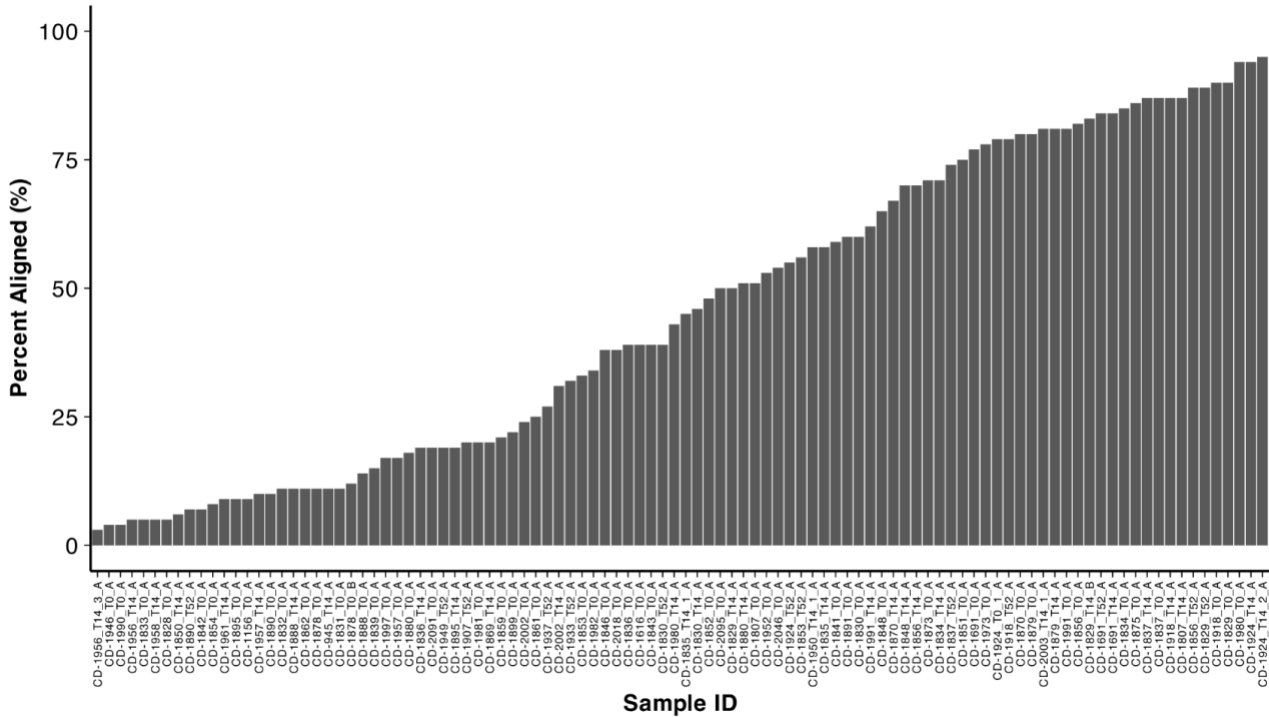

**B** Sequencing reads (millions) (log<sub>10</sub>p) of all stool samples used in study (N=102)

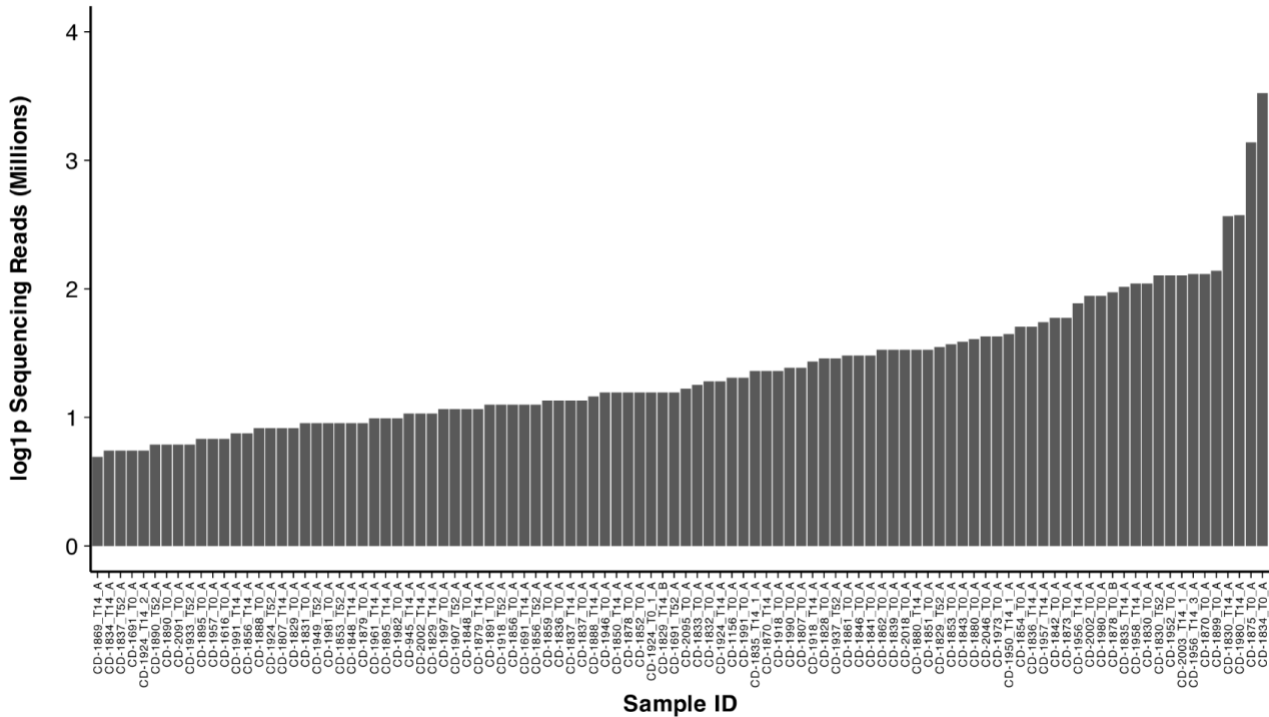

Supplement: mmc1.pdf [file mmc1.pdf]
